# Supplementary material for: S100A11: A Potential Carcinogen and Prognostic Marker That Correlates with the Immunosuppressive Microenvironment in Pan-Cancer
Source: PubMed Central journal article supplement (PMC9809332; doi:10.7150/jca.78011), 2023-01-01
Supplement: jcav14p0088s1.pdf [file jcav14p0088s1.pdf]

**Sup-Figure 1:** The single cell expression of S100A11 using TISCH database,

**Sup-Figure 2**

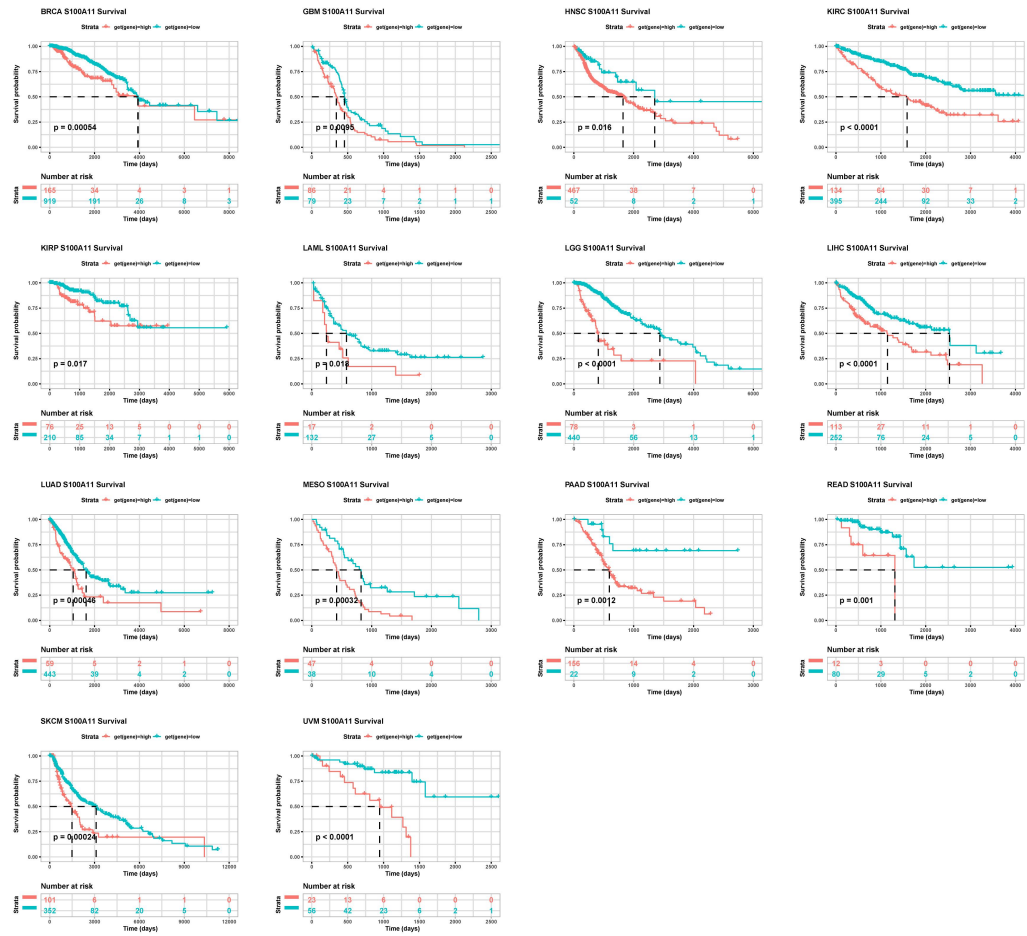

**Sup-Figure 2:** The Kaplan-Meier curves of S100A11 in TCGA pan-cancer. Only significant results (logrank  $p < 0.05$ ) were displayed.

### Sup-Figure 3

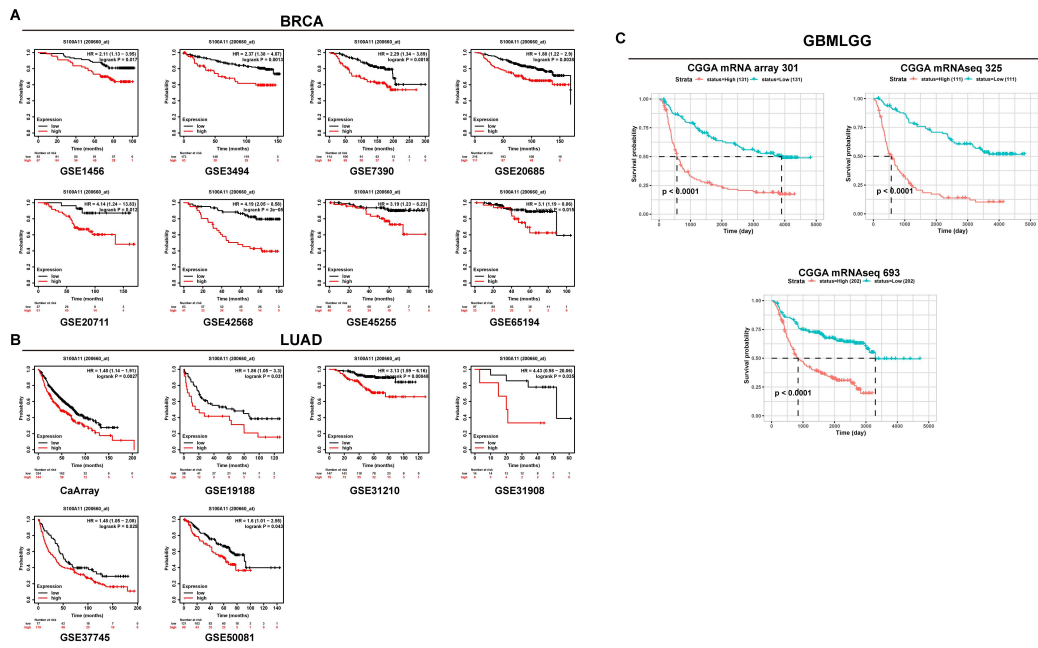

**Sup-Figure 3:** Survival analysis verification of S100A11.

(A). The survival analysis of S100A11 in BRCA using indicated GEO datasets.  
 (B). The survival analysis of S100A11 in LUAD using indicated GEO datasets.  
 (C). The survival analysis of S100A11 in glioma using indicated CGGA datasets.

### Sup-Figure 4

Survival difference between high and low methylation in each cancer

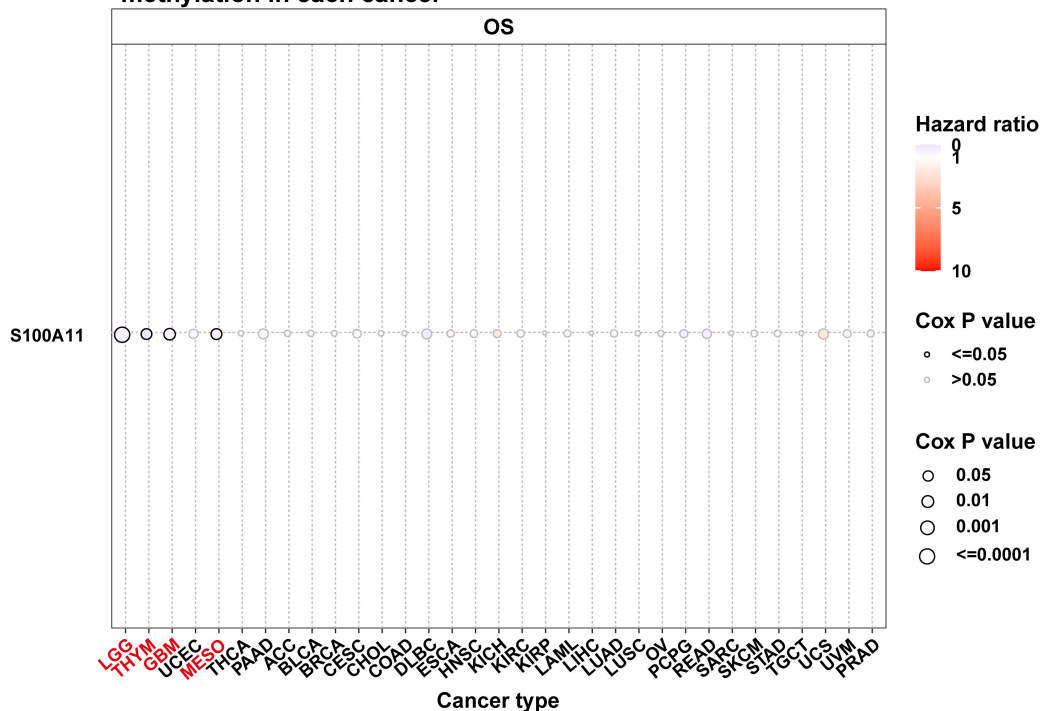

**Sup-Figure 4:** The survival analysis of S100A11 methylation level.

# Sup-Figure 5

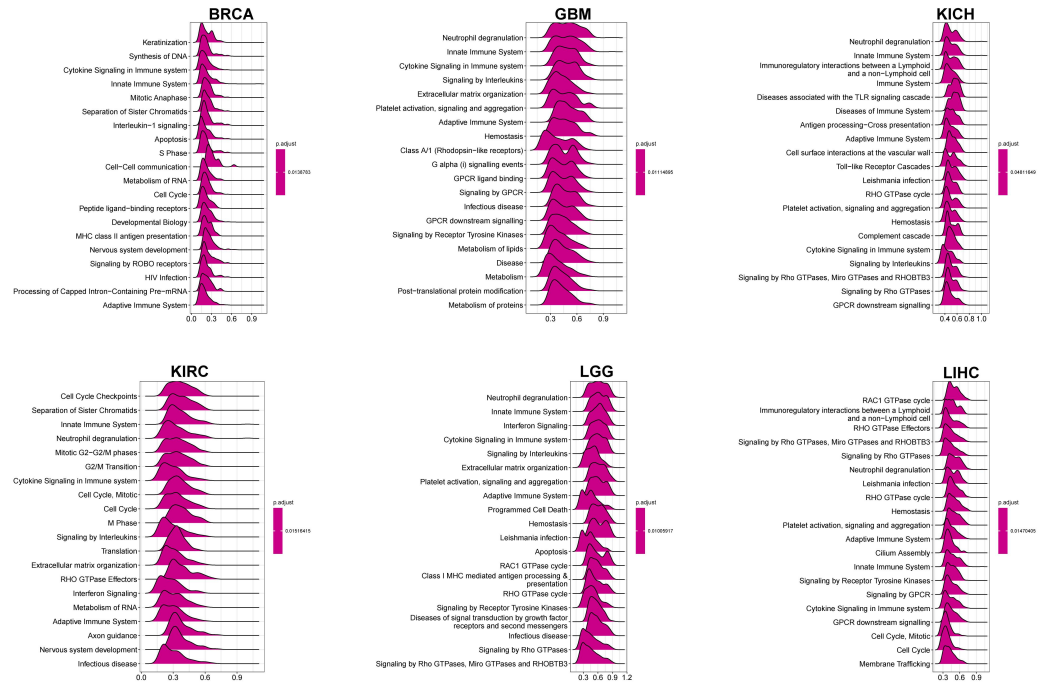

**Sup-Figure 5:** The top20 GSEA results of S100A11 in indicated tumor types.

## Sup-Figure 6

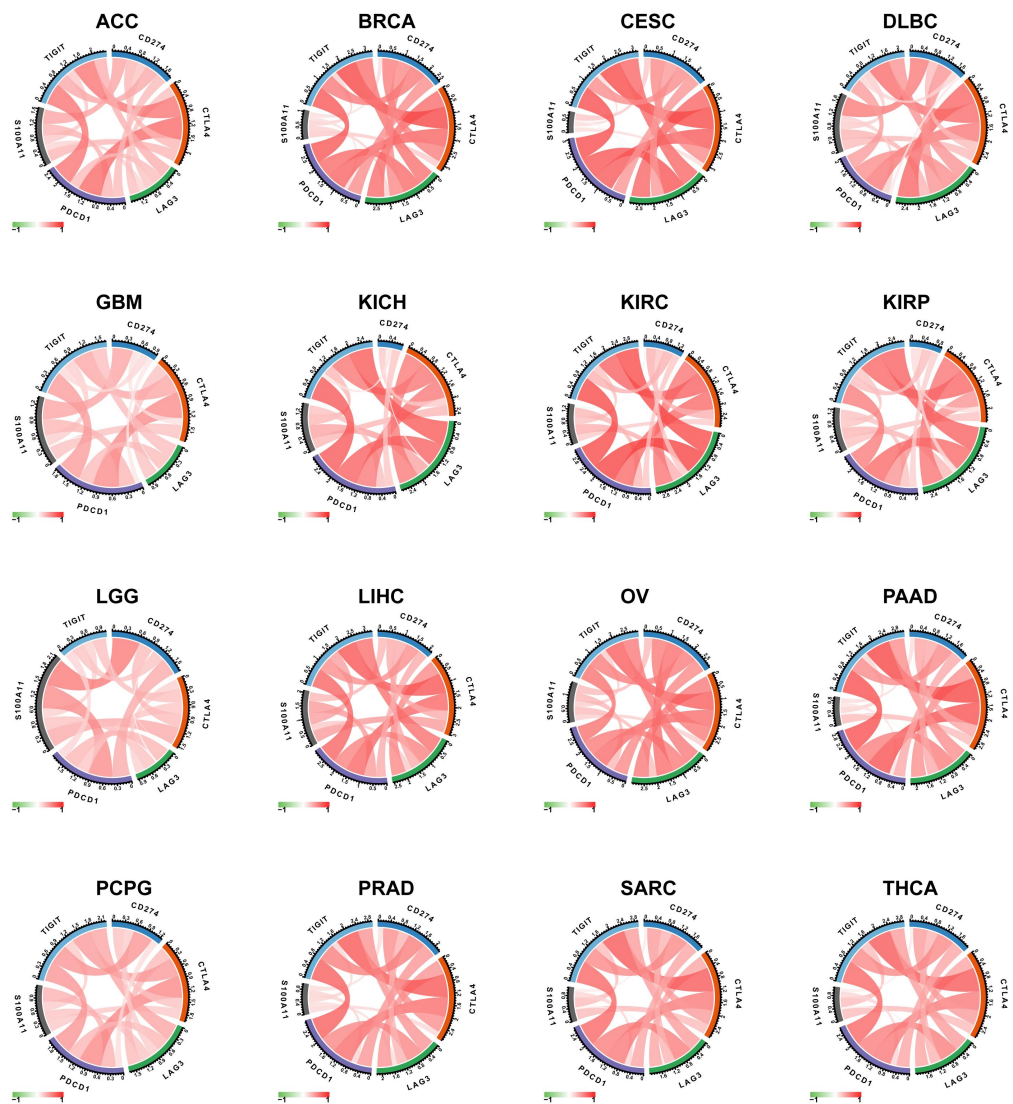

**Sup-Figure 6:** The correlation of S100A11 with immune checkpoints in indicated tumor types. Red line represent positive correlation. The deeper the color, the stronger the correlation.

# Sup-Figure 7

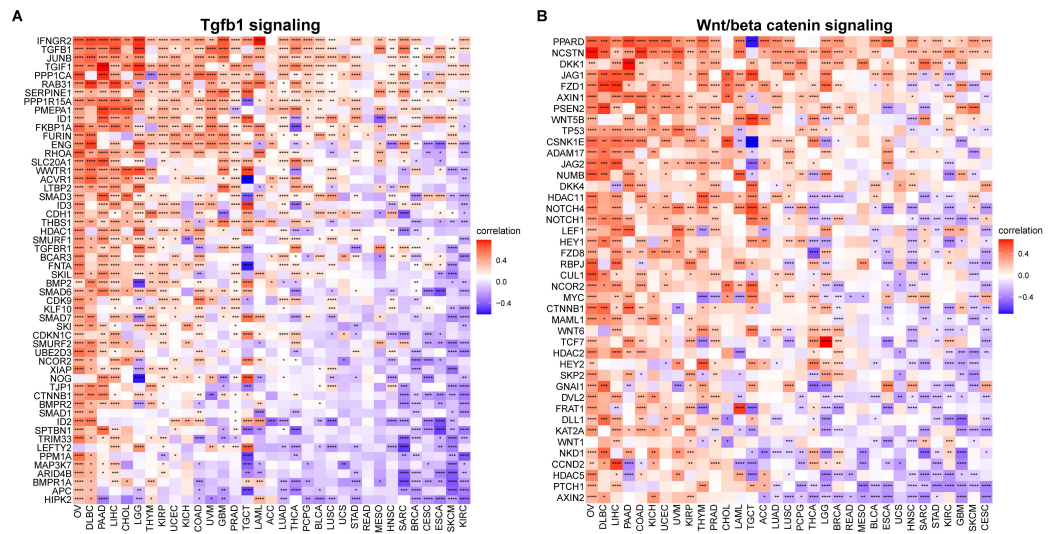

**Sup-Figure 7: The correlation of S100A11 with genes in Tgfb1 signaling (A) and Wnt/beta-catenin signaling (B).**

## Supplementary Tables

**Supplementary Table 1**

| Tumor type | Full names                                                       | Sample size of tumor tissues from TCGA | Sample size of normal tissues from TCGA | Sample size of normal tissues from GTEx |
|------------|------------------------------------------------------------------|----------------------------------------|-----------------------------------------|-----------------------------------------|
| ACC        | Adrenocortical carcinoma                                         | 77                                     | 0                                       | 128                                     |
| BLCA       | Bladder Urothelial Carcinoma                                     | 407                                    | 19                                      | 9                                       |
| BRCA       | Breast invasive carcinoma                                        | 1098                                   | 113                                     | 179                                     |
| CESC       | Cervical squamous cell carcinoma and endocervical adenocarcinoma | 306                                    | 3                                       | 10                                      |
| CHOL       | Cholangiocarcinoma                                               | 36                                     | 9                                       | 0                                       |
| COAD       | Colon adenocarcinoma                                             | 288                                    | 41                                      | 308                                     |
| DLBC       | Lymphoid Neoplasm Diffuse Large B-cell Lymphoma                  | 47                                     | 0                                       | 444                                     |
| ESCA       | Esophageal carcinoma                                             | 182                                    | 13                                      | 653                                     |
| GBM        | Glioblastoma multiforme                                          | 165                                    | 0                                       | 1152                                    |
| HNSC       | Head and Neck squamous cell carcinoma                            | 520                                    | 44                                      | 0                                       |
| KICH       | Kidney Chromophobe                                               | 66                                     | 25                                      | 28                                      |
| KIRC       | Kidney renal clear cell carcinoma                                | 531                                    | 72                                      | 28                                      |
| KIRP       | Kidney renal papillary cell carcinoma                            | 289                                    | 32                                      | 28                                      |
| LAML       | Acute Myeloid Leukemia                                           | 173                                    | 0                                       | 70                                      |
| LGG        | Brain Lower Grade Glioma                                         | 522                                    | 0                                       | 1152                                    |
| LIHC       | Liver hepatocellular carcinoma                                   | 371                                    | 50                                      | 110                                     |
| LUAD       | Lung adenocarcinoma                                              | 515                                    | 59                                      | 288                                     |
| LUSC       | Lung squamous cell carcinoma                                     | 498                                    | 50                                      | 288                                     |
| MESO       | Mesothelioma                                                     | 87                                     | 0                                       | 0                                       |
| OV         | Ovarian serous cystadenocarcinoma                                | 427                                    | 0                                       | 88                                      |
| PAAD       | Pancreatic adenocarcinoma                                        | 179                                    | 4                                       | 167                                     |
| PCPG       | Pheochromocytoma and Paraganglioma                               | 182                                    | 3                                       | 0                                       |
| PRAD       | Prostate adenocarcinoma                                          | 496                                    | 52                                      | 100                                     |
| READ       | Rectum adenocarcinoma                                            | 92                                     | 10                                      | 308                                     |
| SARC       | Sarcoma                                                          | 262                                    | 2                                       | 0                                       |
| SKCM       | Skin Cutaneous Melanoma                                          | 469                                    | 1                                       | 812                                     |
| STAD       | Stomach adenocarcinoma                                           | 414                                    | 36                                      | 174                                     |
| TGCT       | Testicular Germ Cell Tumors                                      | 137                                    | 0                                       | 165                                     |
| THCA       | Thyroid carcinoma                                                | 512                                    | 59                                      | 279                                     |
| THYM       | Thymoma                                                          | 119                                    | 2                                       | 444                                     |
| UCEC       | Uterine Corpus Endometrial Carcinoma                             | 181                                    | 13                                      | 89                                      |
| UCS        | Uterine Carcinosarcoma                                           | 57                                     | 0                                       | 89                                      |
| UVM        | Uveal Melanoma                                                   | 79                                     | 0                                       | 0                                       |

Supplementary Table 1: The sample size information

**Supplementary Table 2**

| Correlation  | P value     | Drug name    | Type            |
|--------------|-------------|--------------|-----------------|
| -0.123963915 | 0.000630242 | Dasatinib    | negtive         |
| -0.209462183 | 4.72E-09    | Trametinib   | negtive         |
| -0.145103453 | 3.80E-05    | Sapitinib    | negtive         |
| -0.130646524 | 0.000211094 | SCH772984    | negtive         |
| -0.12287161  | 0.000908028 | Selumetinib  | negtive         |
| -0.099908014 | 0.007058643 | Acetalax     | negtive         |
| 0.018786032  | 0.607727369 | Gefitinib    | non-significant |
| 0.055204082  | 0.706366593 | Axitinib     | non-significant |
| -0.02138515  | 0.885286001 | KU-55933     | non-significant |
| 0.213459759  | 0.149679406 | NU7441       | non-significant |
| 0.148319457  | 0.325252222 | Doramapimod  | non-significant |
| 0.246415356  | 0.094977554 | ZM447439     | non-significant |
| 0.253907946  | 0.081609902 | RO-3306      | non-significant |
| 0.028154934  | 0.788778392 | AZD8055      | non-significant |
| -0.017442373 | 0.622069387 | PD0325901    | non-significant |
| 0.185593476  | 0.233441035 | BI-2536      | non-significant |
| 0.090751194  | 0.539587332 | Tozasertib   | non-significant |
| 0.101498046  | 0.492436382 | PF-4708671   | non-significant |
| 0.013176642  | 0.718824784 | Erlotinib    | non-significant |
| 0.165653495  | 0.260494159 | GSK269962A   | non-significant |
| -0.208695652 | 0.168889457 | SB505124     | non-significant |
| 0.047645013  | 0.191260619 | Lapatinib    | non-significant |
| -0.000246785 | 0.994435933 | Taselisib    | non-significant |
| 0.021887889  | 0.724362342 | OSI-027      | non-significant |
| 0.253777367  | 0.088789288 | Ribociclib   | non-significant |
| -0.031123129 | 0.402395028 | ERK_2440     | non-significant |
| -0.06624376  | 0.074459168 | ERK_6604     | non-significant |
| 0.071132866  | 0.055396145 | VSP34_8731   | non-significant |
| 0.060986641  | 0.101547013 | Ibrutinib    | non-significant |
| 0.027137871  | 0.455930315 | AZD3759      | non-significant |
| 0.051168317  | 0.161829418 | AZD8186      | non-significant |
| 0.062017406  | 0.089870338 | Osimertinib  | non-significant |
| 0.026465192  | 0.47134     | VX-11e       | non-significant |
| 0.170675301  | 0.251372011 | AZD6482      | non-significant |
| -0.016208598 | 0.916830301 | BMS-754807   | non-significant |
| 0.311912233  | 1.34E-19    | Camptothecin | positive        |
| 0.381342001  | 2.87E-27    | Vinblastine  | positive        |
| 0.340473271  | 3.24E-22    | Cisplatin    | positive        |
| 0.354969378  | 1.16E-23    | Cytarabine   | positive        |
| 0.228906912  | 1.86E-18    | Docetaxel    | positive        |



|             |             |                    |          |
|-------------|-------------|--------------------|----------|
| 0.294751111 | 1.94E-16    | Navitoclax         | positive |
| 0.464014955 | 1.41E-41    | Vorinostat         | positive |
| 0.352567855 | 1.73E-23    | Nilotinib          | positive |
| 0.346505193 | 8.33E-23    | Olaparib           | positive |
| 0.240168398 | 1.97E-11    | AZD7762            | positive |
| 0.222822357 | 0.031807046 | SB216763           | positive |
| 0.073832016 | 0.036691681 | Afatinib           | positive |
| 0.086776289 | 0.016083841 | Staurosporine      | positive |
| 0.168107831 | 1.90E-06    | PLX-4720           | positive |
| 0.362725205 | 8.44E-25    | Wee1 Inhibitor     | positive |
| 0.322771683 | 4.19E-20    | Nutlin-3a (-)      | positive |
| 0.337847273 | 7.67E-21    | Mirin              | positive |
| 0.366689029 | 1.92E-25    | PD173074           | positive |
| 0.362522403 | 5.33E-24    | Alisertib          | positive |
| 0.240974168 | 1.35E-11    | MK-2206            | positive |
| 0.302351353 | 1.17E-17    | Palbociclib        | positive |
| 0.173954977 | 1.67E-06    | Dactolisib         | positive |
| 0.071852386 | 0.047250241 | Pictilisib         | positive |
| 0.218288833 | 2.79E-09    | Obatoclax Mesylate | positive |
| 0.158196481 | 6.75E-06    | 5-Fluorouracil     | positive |
| 0.288216061 | 6.86E-16    | Paclitaxel         | positive |
| 0.292644197 | 6.10E-16    | Crizotinib         | positive |
| 0.203182884 | 2.36E-08    | Rapamycin          | positive |
| 0.433634227 | 6.45E-36    | Sorafenib          | positive |
| 0.360051094 | 7.80E-26    | Irinotecan         | positive |
| 0.339065519 | 2.60E-42    | Oxaliplatin        | positive |
| 0.072954399 | 0.045941368 | BMS-536924         | positive |
| 0.318365936 | 2.96E-20    | GSK1904529A        | positive |
| 0.346212134 | 7.17E-22    | PRIMA-1MET         | positive |
| 0.404806364 | 5.31E-30    | Niraparib          | positive |
| 0.319423933 | 1.25E-19    | MK-1775            | positive |
| 0.243380542 | 3.09E-11    | Dinaciclib         | positive |
| 0.275714485 | 1.33E-14    | Gemcitabine        | positive |
| 0.149374481 | 3.87E-05    | Bortezomib         | positive |
| 0.308964801 | 4.05E-18    | Tamoxifen          | positive |
| 0.272570399 | 9.62E-27    | Fulvestrant        | positive |
| 0.403925547 | 1.13E-32    | EPZ004777          | positive |
| 0.374916231 | 2.07E-26    | YK-4-279           | positive |
| 0.406997934 | 1.36E-16    | Daporinad          | positive |
| 0.337027373 | 9.64E-21    | BMS-345541         | positive |
| 0.285883645 | 4.58E-15    | AZ960              | positive |
| 0.32457297  | 9.77E-20    | Talazoparib        | positive |
| 0.162465548 | 1.09E-05    | XAV939             | positive |

|             |             |                  |          |
|-------------|-------------|------------------|----------|
| 0.247181515 | 6.04E-12    | Dabrafenib       | positive |
| 0.363361174 | 9.87E-25    | Temozolomide     | positive |
| 0.273137552 | 6.90E-14    | AZD5438          | positive |
| 0.265362067 | 4.07E-13    | IAP_5620         | positive |
| 0.094652281 | 0.010720371 | AZD2014          | positive |
| 0.401471638 | 1.87E-29    | AZD1208          | positive |
| 0.115182018 | 0.001880316 | AZD1332          | positive |
| 0.302482788 | 7.94E-17    | Ruxolitinib      | positive |
| 0.326963784 | 2.19E-21    | Linsitinib       | positive |
| 0.296392709 | 1.18E-16    | Epirubicin       | positive |
| 0.353680689 | 1.84E-23    | Cyclophosphamide | positive |
| 0.291377521 | 4.39E-16    | Pevonedistat     | positive |
| 0.145651713 | 1.94E-08    | Uprosertib       | positive |
| 0.234741919 | 1.56E-10    | LCL161           | positive |
| 0.172685515 | 8.80E-07    | Luminespib       | positive |
| 0.115752006 | 0.001030998 | Alpelisib        | positive |
| 0.377890678 | 1.73E-28    | EPZ5676          | positive |
| 0.362555544 | 6.08E-24    | IWP-2            | positive |
| 0.381485392 | 1.45E-26    | Leflunomide      | positive |
| 0.387724133 | 1.13E-27    | Entinostat       | positive |
| 0.331198736 | 6.21E-22    | LGK974           | positive |
| 0.258973149 | 1.37E-12    | VE-822           | positive |
| 0.19934038  | 6.08E-08    | WZ4003           | positive |
| 0.32111962  | 7.09E-19    | CZC24832         | positive |
| 0.191056283 | 2.69E-07    | AZD5582          | positive |
| 0.230061354 | 4.32E-10    | GSK2606414       | positive |
| 0.34771025  | 4.65E-22    | PFI3             | positive |
| 0.384766592 | 4.94E-27    | PCI-34051        | positive |
| 0.299895988 | 1.49E-16    | Wnt-C59          | positive |
| 0.247056645 | 1.52E-11    | I-BET-762        | positive |
| 0.296954225 | 3.17E-16    | RVX-208          | positive |
| 0.194580915 | 1.26E-07    | OTX015           | positive |
| 0.308730258 | 1.78E-17    | GSK343           | positive |
| 0.329281521 | 8.06E-20    | ML323            | positive |
| 0.107391385 | 0.003767606 | Entospletinib    | positive |
| 0.246406493 | 1.67E-11    | PRT062607        | positive |
| 0.373319603 | 2.00E-25    | AGI-6780         | positive |
| 0.318440716 | 1.43E-18    | Picolinici-acid  | positive |
| 0.245481816 | 2.07E-11    | AZD5153          | positive |
| 0.269385873 | 1.61E-13    | CDK9_5576        | positive |
| 0.291666701 | 1.10E-15    | CDK9_5038        | positive |
| 0.345218539 | 1.23E-21    | Eg5_9814         | positive |
| 0.227422666 | 5.70E-10    | IRAK4_4710       | positive |

|             |             |                          |          |
|-------------|-------------|--------------------------|----------|
| 0.299140062 | 1.79E-16    | JAK1_8709                | positive |
| 0.382669203 | 1.35E-26    | AZD5991                  | positive |
| 0.239828791 | 6.06E-11    | PAK_5339                 | positive |
| 0.28595013  | 4.14E-15    | TAF1_5496                | positive |
| 0.213495872 | 6.57E-09    | ULK1_4989                | positive |
| 0.22184901  | 1.55E-09    | IGF1R_3801               | positive |
| 0.273103903 | 6.95E-14    | JAK_8517                 | positive |
| 0.329842884 | 1.44E-20    | AZD4547                  | positive |
| 0.40837717  | 1.49E-30    | Zoledronate              | positive |
| 0.358191579 | 2.12E-23    | Carmustine               | positive |
| 0.269987154 | 1.36E-13    | Topotecan                | positive |
| 0.344356077 | 1.22E-21    | Teniposide               | positive |
| 0.325912484 | 1.99E-19    | Mitoxantrone             | positive |
| 0.197654478 | 2.37E-14    | Dactinomycin             | positive |
| 0.305426808 | 3.85E-17    | Fludarabine              | positive |
| 0.343582296 | 1.62E-21    | Nelarabine               | positive |
| 0.378233208 | 6.63E-26    | Vincristine              | positive |
| 0.356236896 | 3.81E-23    | Podophyllotoxin bromide  | positive |
| 0.178314874 | 1.38E-06    | Dihydrorotenone          | positive |
| 0.305969206 | 3.37E-17    | Gallibiscoquinazole      | positive |
| 0.348961754 | 3.24E-22    | Elephantin               | positive |
| 0.225772956 | 7.63E-10    | Sinularin                | positive |
| 0.390541285 | 8.55E-28    | Sabutoclax               | positive |
| 0.330782304 | 5.37E-20    | LY2109761                | positive |
| 0.259749585 | 1.17E-12    | OF-1                     | positive |
| 0.205442887 | 2.33E-08    | MN-64                    | positive |
| 0.328128832 | 1.10E-19    | KRAS (G12C) Inhibitor-12 | positive |
| 0.120579281 | 0.000806487 | MG-132                   | positive |
| 0.185082943 | 3.38E-07    | BDP-00009066             | positive |
| 0.260910362 | 4.03E-13    | Buparlisib               | positive |
| 0.104621687 | 5.06E-05    | Ulixertinib              | positive |
| 0.452808946 | 2.43E-39    | Venetoclax               | positive |
| 0.333964403 | 6.03E-21    | ABT737                   | positive |
| 0.195980254 | 6.54E-08    | Afuresertib              | positive |
| 0.325616872 | 5.85E-20    | AGI-5198                 | positive |
| 0.186667944 | 2.67E-07    | AZD5363                  | positive |
| 0.275119939 | 1.78E-14    | AZD6738                  | positive |
| 0.216533874 | 2.13E-09    | Cediranib                | positive |
| 0.164157415 | 6.31E-06    | Ipatasertib              | positive |
| 0.284696858 | 1.97E-15    | GDC0810                  | positive |
| 0.093677271 | 0.011055475 | GNE-317                  | positive |
| 0.346202238 | 1.63E-22    | GSK2578215A              | positive |
| 0.378622334 | 6.09E-27    | I-BRD9                   | positive |

|             |             |                         |          |
|-------------|-------------|-------------------------|----------|
| 0.322309389 | 1.45E-19    | Telomerase Inhibitor IX | positive |
| 0.432948765 | 1.59E-35    | MIRA-1                  | positive |
| 0.311790294 | 2.38E-18    | NVP-ADW742              | positive |
| 0.357457658 | 5.40E-24    | P22077                  | positive |
| 0.305069173 | 1.42E-17    | Savolitinib             | positive |
| 0.266304334 | 1.26E-13    | UMI-77                  | positive |
| 0.116780524 | 0.001376608 | WIKI4                   | positive |
| 0.139990204 | 0.000121155 | Sepantronium bromide    | positive |
| 0.34461881  | 2.61E-22    | MIM1                    | positive |
| 0.216257741 | 2.24E-09    | WEHI-539                | positive |
| 0.235152753 | 7.20E-11    | BPD-00008900            | positive |
| 0.285660772 | 1.71E-15    | Foretinib               | positive |
| 0.363798538 | 9.24E-25    | BIBR-1532               | positive |
| 0.306642089 | 9.97E-18    | Pyridostatin            | positive |
| 0.376254962 | 1.96E-26    | AMG-319                 | positive |
| 0.338376591 | 1.93E-21    | MK-8776                 | positive |
| 0.347773793 | 1.24E-22    | Vinorelbine             | positive |
| 0.301945743 | 3.97E-17    | LJI308                  | positive |
| 0.201605238 | 2.97E-08    | AZ6102                  | positive |
| 0.251152277 | 3.88E-12    | GSK591                  | positive |
| 0.307946188 | 9.67E-18    | VE821                   | positive |
| 0.23113227  | 1.87E-10    | AT13148                 | positive |
| 0.426688252 | 0.002781689 | JQ1                     | positive |

Supplementary Table 2: The correlation of S100A11 with indicated anti-tumor drugs
